# Supplementary material for: Mechanisms of clay smear formation in unconsolidated sediments – insights from 3-D observations of excavated normal faults
Source: Copernicus journal article supplement (doi:10.5194/se-7-789-2016), 2016-05-18
Supplement: Supplementary file 1 [file se-7-789-2016-supplement.zip]

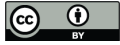

## *Supplement of*

# **Mechanisms of clay smear formation in unconsolidated sediments – insights from 3-D observations of excavated normal faults**

**M. Kettermann et al.**

*Correspondence to:* Michael Kettermann ([michael.kettermann@emr.rwth-aachen.de](mailto:michael.kettermann@emr.rwth-aachen.de))

- [se-7-789-2016-supplement-title-page.pdf](#)
- Mixing Model MATLAB.m
- Photogrammetric 3D model
  - 3DSample.ply
  - Capture\_2014\_11\_20\_17\_16\_00\_tex\_0.jpg

The copyright of individual parts of the supplement might differ from the CC-BY 3.0 licence.
